# Supplementary material
Source: PubMed Central journal article supplement (PMC4058552)

## Supplementary Online Content

Fazel S, Wolf A, Pillas D, Lichtenstein P, Långström N. Suicide, fatal injuries, and other causes of premature mortality in patients with traumatic brain injury. Published online January 15, 2014. *JAMA Psychiatry*. doi:10.1001/jamapsychiatry.2013.3935.

**eTable 1.** Absolute Rates and Relative Odds of Death at Least 6 Months After Traumatic Brain Injury by Primary Cause of Death According to *ICD* Chapter and as Percentage of Total Deaths

**eTable 2.** Absolute Rates and Relative Odds of Premature Death at Least 6 Months After a Diagnosis of Traumatic Brain Injury (TBI) Compared With Unrelated Population Controls, Stratified by Psychiatric Comorbidity Diagnosed Before TBI or New Diagnoses After TBI

**eFigure 1.** Survival Function by TBI and psychiatric diagnosis status

**eTable 1.** Absolute Rates and Relative Odds of Death at Least 6 Months After Traumatic Brain Injury by Primary Cause of Death According to *ICD* Chapter and as Percentage of Total Deaths

| <b>ICD chapter</b>                                                                          | <b>Deaths in cases, No. (% of deaths)</b> | <b>Deaths in controls, No. (% of deaths)</b> | <b>aOR (95% CI)</b> |
|---------------------------------------------------------------------------------------------|-------------------------------------------|----------------------------------------------|---------------------|
| I Certain infectious and parasitic diseases                                                 | 33 (1.4%)                                 | 89 (1.3%)                                    | 3.2 (2.1-4.9)       |
| II Neoplasms                                                                                | 263 (11.1%)                               | 1,599 (24.0%)                                | 1.5 (1.3-1.8)       |
| IV Endocrine nutritional and metabolic diseases                                             | 72 (3.0%)                                 | 179 (2.7%)                                   | 3.4 (2.5-4.6)       |
| V Mental and behavioural disorders                                                          | 135 (5.7%)                                | 158 (2.4%)                                   | 8.3 (6.3-11.0)      |
| VI Diseases of the nervous system                                                           | 159 (6.7%)                                | 219 (3.3%)                                   | 6.7 (5.3-8.4)       |
| IX Diseases of the circulatory system                                                       | 249 (10.5%)                               | 933 (14.0%)                                  | 2.4 (2.0-2.7)       |
| X Diseases of the respiratory system                                                        | 73 (3.1%)                                 | 129 (1.9%)                                   | 4.8 (3.5-6.5)       |
| XI Diseases of the digestive system                                                         | 124 (5.2%)                                | 218 (3.3%)                                   | 4.7 (3.7-5.9)       |
| XVII Congenital malformations deformations and chromosomal abnormalities                    | 34 (1.4%)                                 | 115 (1.7%)                                   | 2.3 (1.5-3.7)       |
| XVIII Symptoms signs and abnormal clinical and laboratory findings not elsewhere classified | 55 (2.3%)                                 | 228 (3.4%)                                   | 2.1 (1.5-2.9)       |
| Other non-external (Chapters III, VII, VIII, XII, XIII, XIV, XV, XVI, XIX)                  | 25 (1.5%)                                 | 75 (1.1%)                                    | 2.8 (1.7-4.6)       |
| XX External causes of morbidity and mortality                                               | 1156 (48.6%)                              | 2727 (40.9%)                                 | 3.8 (3.5-4.1)       |
| Total deaths                                                                                | 2378 (100%)                               | 6669 (100%)                                  | 3.2 (3.0-3.4)       |

Adjusted odds ratios (aOR) refer to risks of premature death by *ICD* chapter in TBI patients compared with general population controls matched by sex and birth year, and adjusted by income, and immigrant and single status.

**eTable 2.** Absolute Rates and Relative Odds of Premature Death at Least 6 Months After a Diagnosis of Traumatic Brain Injury (TBI) Compared With Unrelated Population Controls, Stratified by Psychiatric Comorbidity Diagnosed Before TBI or New Diagnoses After TBI

| Diagnostic group                       | All-cause mortality |                  | Suicide      |                  | Accidents    |                  |
|----------------------------------------|---------------------|------------------|--------------|------------------|--------------|------------------|
|                                        | No. (%)             | aOR (95% CI)     | No. (%)      | aOR (95% CI)     | No. (%)      | aOR (95% CI)     |
| <i>Any psychiatric disorder before</i> |                     |                  |              |                  |              |                  |
| No TBI, no psychiatric disorder        | 6,718 (0.3%)        | 1.0 (ref)        | 1,078 (0.1%) | 1.0 (ref)        | 1,066 (0.1%) | 1.0 (ref)        |
| No TBI, psychiatric disorder           | 1,327 (1.6%)        | 4.4 (4.0-4.7)    | 320 (0.4%)   | 7.3 (6.1-8.7)    | 147 (0.2%)   | 4.0 (3.2-5.1)    |
| TBI, no psychiatric disorder           | 1,685 (0.9%)        | 2.4 (2.3-2.6)    | 291 (0.1%)   | 2.5 (2.1-2.9)    | 383 (0.2%)   | 3.4 (3.0-3.9)    |
| TBI, psychiatric disorder              | 1,125 (5.5%)        | 12.9 (11.6-14.3) | 231 (1.1%)   | 17.9 (13.8-23.2) | 191 (0.9%)   | 17.3 (13.1-22.8) |
| <i>Any new psychiatric disorder*</i>   |                     |                  |              |                  |              |                  |
| No TBI, no psychiatric disorder        | 5,174 (0.3%)        | 1.0 (ref)        | 606 (0.03%)  | 1.0 (ref)        | 872 (0.04%)  | 1.0 (ref)        |
| No TBI, psychiatric disorder           | 1,544 (1.5%)        | 4.2 (3.9-4.5)    | 472 (0.5%)   | 10.7 (9.0-12.8)  | 194 (0.2%)   | 3.2 (2.6-3.9)    |
| TBI, no                                | 1,050               | 1.8 (1.5-        | 141          | 1.5 (1.0-        | 277          | 3.1 (1.8-        |

|                           |               |                   |               |                     |               |                    |
|---------------------------|---------------|-------------------|---------------|---------------------|---------------|--------------------|
| psychiatric disorder      | (0.6%)        | 2.2)              | (0.1%)        | 2.1)                | (0.2%)        | 5.4)               |
| TBI, psychiatric disorder | 635<br>(3.5%) | 7.4 (6.6-<br>8.3) | 150<br>(0.8%) | 11.9 (8.9-<br>16.0) | 106<br>(0.6%) | 7.8 (5.8-<br>10.6) |

Any psychiatric disorder also included substance abuse. aORs depict odds ratios for deaths during follow-up in TBI patients compared with unrelated population controls, stratified by psychiatric diagnoses, and adjusted for income, marital status and immigration status. 95% CIs are 95% confidence intervals. The suicide category included both certain and undetermined deaths

\*Within the subsample of those who had no psychiatric diagnoses before TBI.

**eFigure 1.** Survival Function by TBI and psychiatric diagnosis status

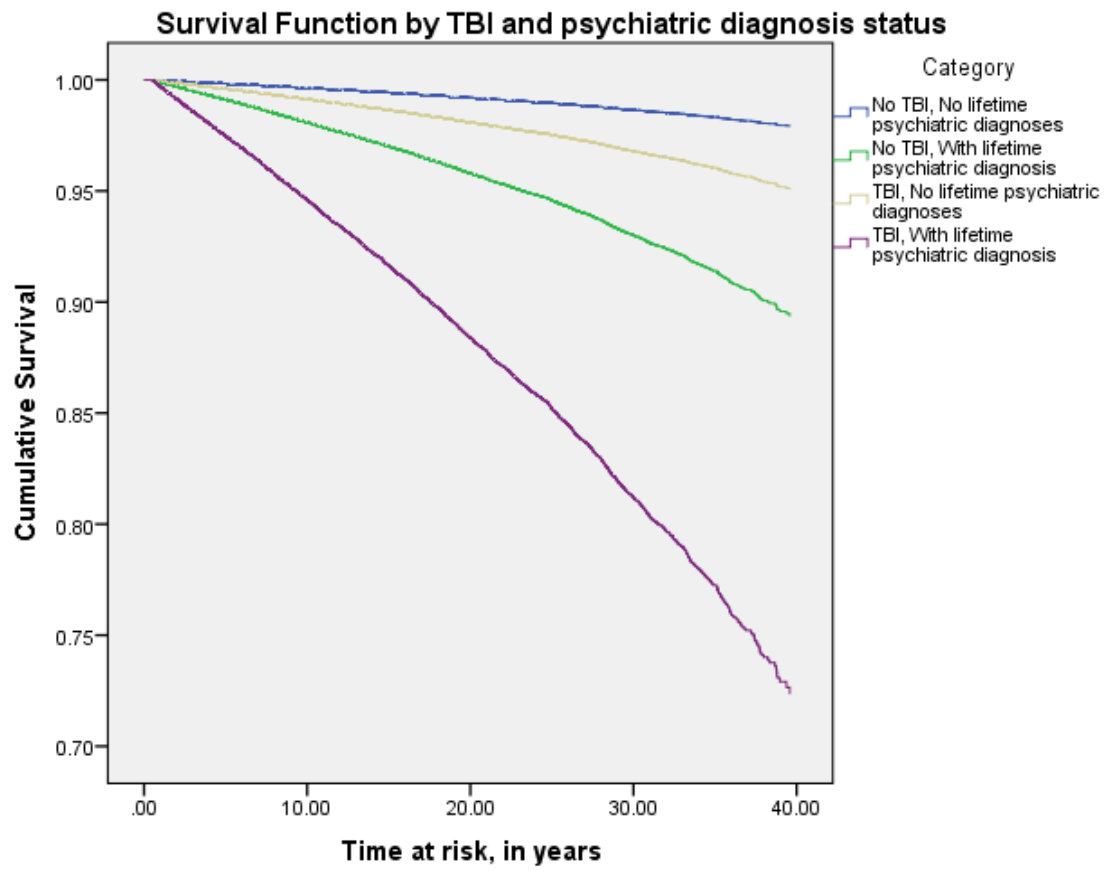

Supplement: NIHMS56849-supplement-Online_supplement.pdf [file NIHMS56849-supplement-Online_supplement.pdf]
